# Supplementary material for: Two-step magnetic switching in a mononuclear iron(ii) complex around room temperature
Source: Royal Society of Chemistry journal article supplement (doi:10.1039/c5dt00585j), 2015-01-01
Supplement: c5dt00585j1.pdf [file c5dt00585j1.pdf]

## Electronic Supplementary Information

### Two-Step Magnetic Switching in a Mononuclear Iron(II) Complex around Room Temperature

Qian Yang, Xin Cheng, YeXin Wang, BingWu Wang\*, ZheMing Wang and Song Gao\*

**Table S1.** Crystallographic data for **1** at 100 K, 230 K and 250 K.

| Complex                                       | 100 K                                                                           | 230 K                                                                           | 250 K                                                                           |
|-----------------------------------------------|---------------------------------------------------------------------------------|---------------------------------------------------------------------------------|---------------------------------------------------------------------------------|
| Empirical formula                             | C <sub>42</sub> H <sub>22</sub> F <sub>6</sub> FeN <sub>10</sub> S <sub>2</sub> | C <sub>42</sub> H <sub>22</sub> F <sub>6</sub> FeN <sub>10</sub> S <sub>2</sub> | C <sub>42</sub> H <sub>22</sub> F <sub>6</sub> FeN <sub>10</sub> S <sub>2</sub> |
| Formula weight                                | 900.67                                                                          | 900.67                                                                          | 900.67                                                                          |
| Temperature (K)                               | 100.00(10)                                                                      | 230.01(10)                                                                      | 250.00(10) K                                                                    |
| Crystal system                                | Orthorhombic                                                                    | Orthorhombic                                                                    | Orthorhombic                                                                    |
| Space group                                   | <i>Pbcn</i>                                                                     | <i>Pbcn</i>                                                                     | <i>Pbcn</i>                                                                     |
| <i>a</i> (Å)                                  | 12.7527(5)                                                                      | 12.8121(4)                                                                      | 12.8112(5)                                                                      |
| <i>b</i> (Å)                                  | 9.9764(3)                                                                       | 10.0581(4)                                                                      | 10.0738(4)                                                                      |
| <i>c</i> (Å)                                  | 29.6380(15)                                                                     | 29.6866(9)                                                                      | 29.6623(11)                                                                     |
| Volume (Å <sup>3</sup> )                      | 3770.7(3)                                                                       | 3825.6(2)                                                                       | 3828.1(2)                                                                       |
| <i>Z</i>                                      | 4                                                                               | 4                                                                               | 4                                                                               |
| $\mu$ (mm <sup>-1</sup> )                     | 0.589                                                                           | 0.581                                                                           | 0.581                                                                           |
| Reflections collected                         | 12710                                                                           | 13988                                                                           | 13462                                                                           |
| Unique reflections                            | 3317                                                                            | 3367                                                                            | 4196                                                                            |
| R <sub>int</sub>                              | 0.0390                                                                          | 0.0247                                                                          | 0.0226                                                                          |
| R <sub>1</sub> /wR <sub>2</sub> /S (all data) | 0.0715/0.1454/1.036                                                             | 0.0604/0.1449/1.068                                                             | 0.0708/0.1497/1.037                                                             |
| Residual $\rho$ (e Å <sup>-3</sup> )          | 1.731 and -0.269                                                                | 1.414 and -0.250                                                                | 1.371 and -0.245                                                                |

**Table S2.** Crystallographic data for **1** at 270 K, 298 K and 420 K.

| Complex                                                              | 270 K                                                                           | 298 K                                                                           | 420 K                                                                           |
|----------------------------------------------------------------------|---------------------------------------------------------------------------------|---------------------------------------------------------------------------------|---------------------------------------------------------------------------------|
| Empirical formula                                                    | C <sub>42</sub> H <sub>22</sub> F <sub>6</sub> FeN <sub>10</sub> S <sub>2</sub> | C <sub>42</sub> H <sub>22</sub> F <sub>6</sub> FeN <sub>10</sub> S <sub>2</sub> | C <sub>42</sub> H <sub>22</sub> F <sub>6</sub> FeN <sub>10</sub> S <sub>2</sub> |
| Formula weight                                                       | 900.67                                                                          | 900.67                                                                          | 900.67                                                                          |
| Temperature (K)                                                      | 270.00(10)                                                                      | 298.00(10) K                                                                    | 420.00(11) K                                                                    |
| Crystal system                                                       | Orthorhombic                                                                    | Orthorhombic                                                                    | Orthorhombic                                                                    |
| Space group                                                          | <i>Pbcn</i>                                                                     | <i>Pbcn</i>                                                                     | <i>Pbcn</i>                                                                     |
| <i>a</i> (Å)                                                         | 12.8042(6)                                                                      | 12.8371(6)                                                                      | 12.9544(8)                                                                      |
| <i>b</i> (Å)                                                         | 10.6288(6)                                                                      | 10.6474(5)                                                                      | 10.7221(8)                                                                      |
| <i>c</i> (Å)                                                         | 28.3592(14)                                                                     | 28.4181(13)                                                                     | 28.685(2)                                                                       |
| Volume (Å <sup>3</sup> )                                             | 3859.5(3)                                                                       | 3884.2(3)                                                                       | 3984.3(5)                                                                       |
| <i>Z</i>                                                             | 4                                                                               | 4                                                                               | 4                                                                               |
| $\mu$ (mm <sup>-1</sup> )                                            | 0.576                                                                           | 0.572                                                                           | 0.558                                                                           |
| Reflections collected                                                | 14799                                                                           | 15126                                                                           | 16606                                                                           |
| Unique reflections                                                   | 3398                                                                            | 3422                                                                            | 3510                                                                            |
| R <sub>int</sub>                                                     | 0.0429                                                                          | 0.0303                                                                          | 0.0389                                                                          |
| <i>R</i> <sub>1</sub> / <i>wR</i> <sub>2</sub> / <i>S</i> (all data) | 0.0636/ 0.1754/1.099                                                            | 0.0877/0.1897/1.058                                                             | 0.1099/0.2124/1.019                                                             |
| Residual $\rho$ (e Å <sup>-3</sup> )                                 | 1.083 and -0.328                                                                | 1.047 and -0.369                                                                | 0.771 and -0.286                                                                |

**Table S3.** Selected bond lengths (Å) and angles (°) for **1** at 100 K, 230 K, 250 K, 270 K, 298 K and 420 K.

| 100 K               |                                |
|---------------------|--------------------------------|
| Fe1-N1 = 1.931(3) Å | N(1)-Fe(1)-N(2) = 92.54(12) °  |
| Fe1-N2 = 1.972(3) Å | N(1)-Fe(1)-N(3) = 88.46(12) °  |
| Fe1-N3 = 1.971(3) Å | N(2)-Fe(1)-N(3) = 82.60(12) °  |
| 230 K               |                                |
| Fe1-N1 = 1.944(3) Å | N(1)-Fe(1)-N(2) = 88.57(12) °  |
| Fe1-N2 = 1.975(3) Å | N(1)-Fe(1)-N(3) = 92.50(12) °  |
| Fe1-N3 = 1.973(3) Å | N(2)-Fe(1)-N(3) = 82.44(11) °  |
| 250 K               |                                |
| Fe1-N1 = 1.940(3) Å | N(1)-Fe(1)-N(2) = 174.62(10) ° |
| Fe1-N2 = 1.975(3) Å | N(1)-Fe(1)-N(3) = 92.40(11) °  |
| Fe1-N3 = 1.976(2) Å | N(2)-Fe(1)-N(3) = 82.38(10) °  |
| 270 K               |                                |
| Fe1-N1 = 1.960(5) Å | N(1)-Fe(1)-N(2) = 90.62(15) °  |
| Fe1-N2 = 2.032(3) Å | N(1)-Fe(1)-N(3) = 94.75(15) °  |
| Fe1-N3 = 2.020(3) Å | N(2)-Fe(1)-N(3) = 80.66(13) °  |
| 298 K               |                                |
| Fe1-N1 = 1.997(5) Å | N(1)-Fe(1)-N(2) = 171.21(15) ° |
| Fe1-N2 = 2.087(3) Å | N(1)-Fe(1)-N(3) = 92.04(15) °  |
| Fe1-N3 = 2.056(3) Å | N(2)-Fe(1)-N(3) = 79.44(12) °  |
| 420 K               |                                |
| Fe1-N1 = 2.090(6) Å | N(1)-Fe(1)-N(2) = 167.05(17) ° |
| Fe1-N2 = 2.214(4) Å | N(1)-Fe(1)-N(3) = 92.04(17) °  |
| Fe1-N3 = 2.158(4) Å | N(2)-Fe(1)-N(3) = 75.44(14) °  |

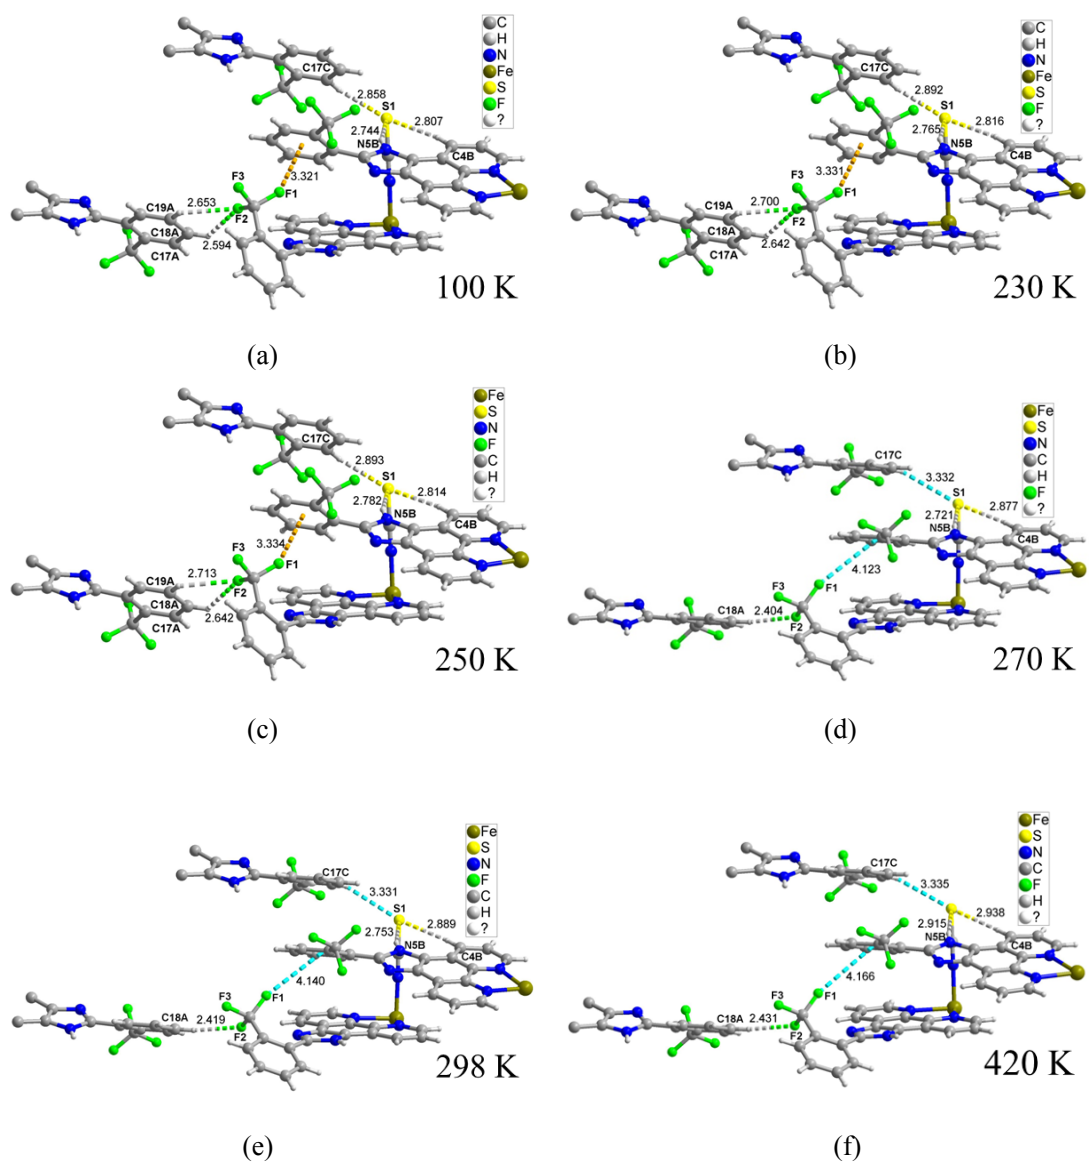

Fig. S1 H-bonds and lone pair- $\pi$  interactions in **1** at (a) 100 K, (b) 230 K, (c) 250 K and (d) 270 K, (e) 298 K, (f) 420 K.

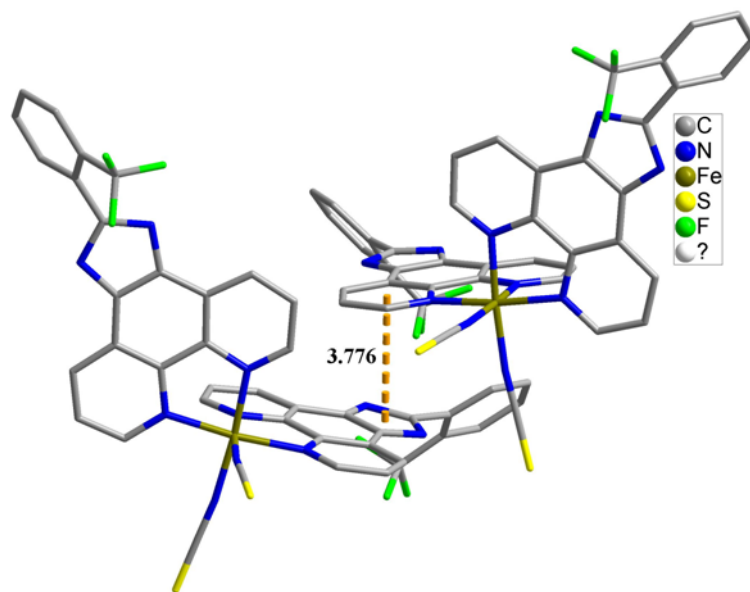

(a)

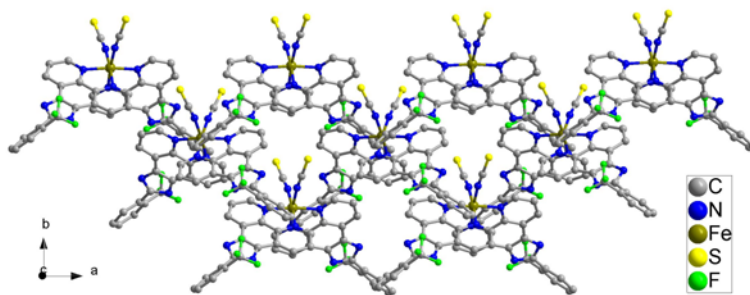

(b)

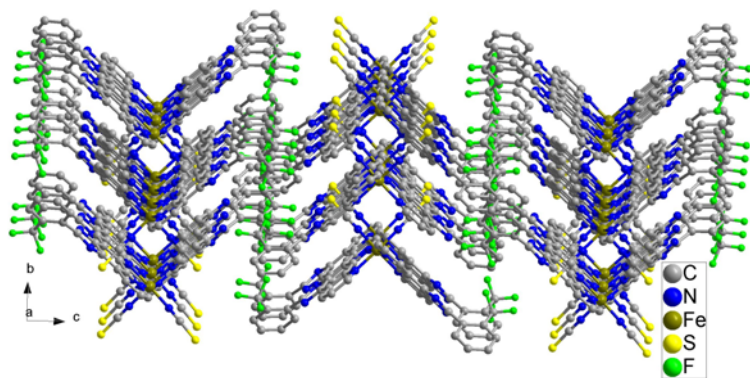

(c)

Fig. S2 (a)  $\pi$ - $\pi$  stacking in LS 1. The 3D structure of LS 1, (b) *ab* plane, (c) *bc* plane.

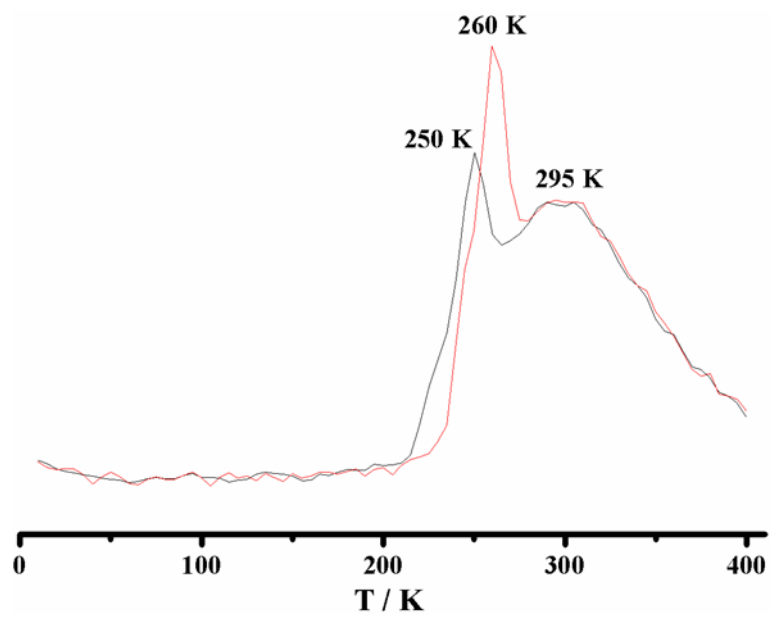

Fig. S3  $d\chi_m T/dT$  curve of **1**.

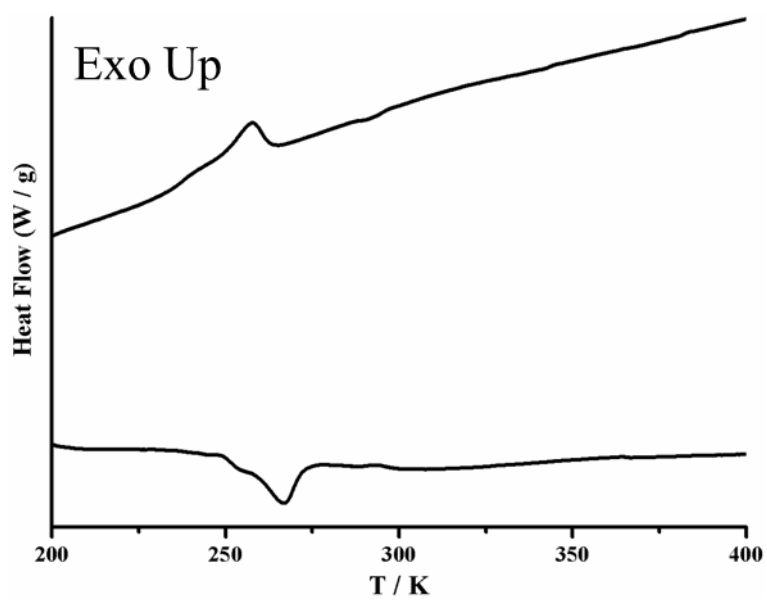

Fig. S4 The differential scanning calorimetry (DSC) curve of **1**.

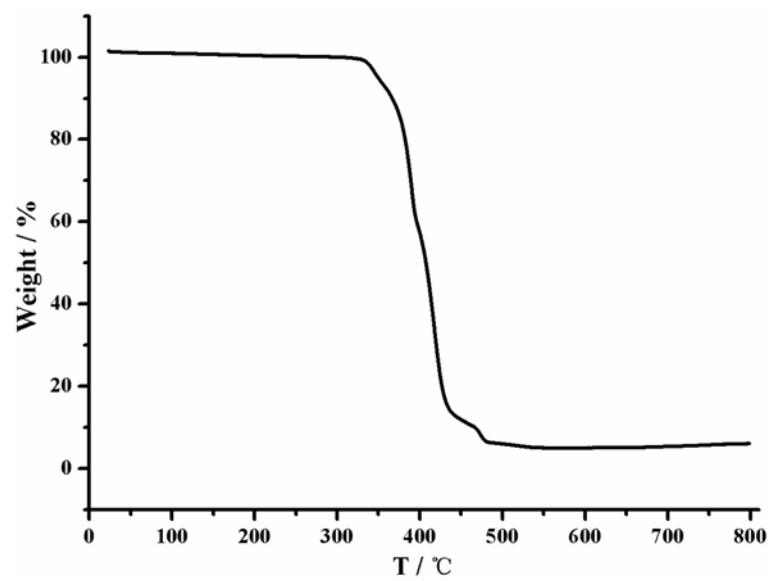

Fig. S5 The thermogravimetric analysis (TGA) curve of **1**.



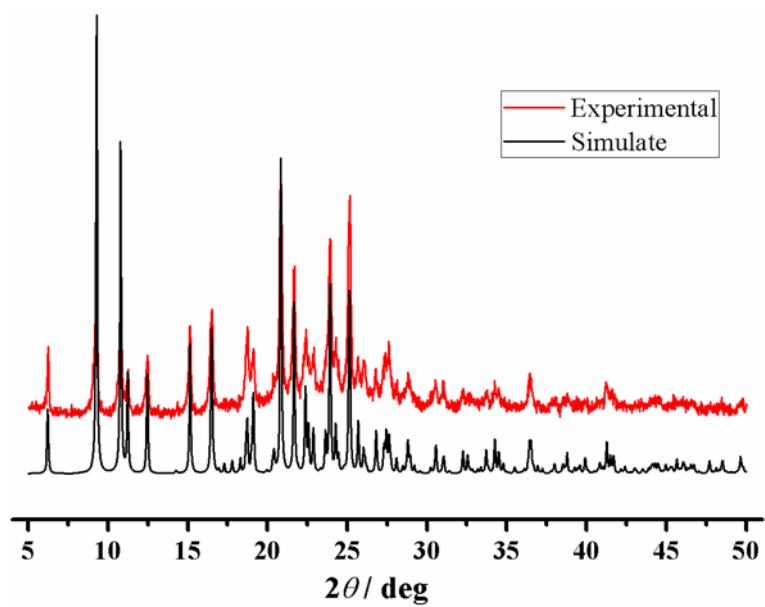

Fig. S6 The XRPD of 1.
